# Supplementary material
Source: PubMed Central journal article supplement (PMC4070421)
Supplement: NIHMS569065-supplement.pdf [file NIHMS569065-supplement.pdf]

## Supplemental Materials

**Supplemental Table 1. Adolescent Outcome and Mediator Descriptive Statistics by Gender, Moving to Opportunity Data (2001-2002).**

|                                 | BOYS                |       |      |                           |       |      |                      |       |      | GIRLS               |       |      |                           |       |      |                      |       |      |
|---------------------------------|---------------------|-------|------|---------------------------|-------|------|----------------------|-------|------|---------------------|-------|------|---------------------------|-------|------|----------------------|-------|------|
|                                 | <u>Total Sample</u> |       |      | <u>Experimental Group</u> |       |      | <u>Control Group</u> |       |      | <u>Total Sample</u> |       |      | <u>Experimental Group</u> |       |      | <u>Control Group</u> |       |      |
|                                 | N                   | Mean  | SD   | N                         | Mean  | SD   | N                    | Mean  | SD   | N                   | Mean  | SD   | N                         | Mean  | SD   | N                    | Mean  | SD   |
| <b>OUTCOMES</b>                 |                     |       |      |                           |       |      |                      |       |      |                     |       |      |                           |       |      |                      |       |      |
| Asthma Diagnosis                | 1393                | 0.23  | 0.42 | 959                       | 0.25  | 0.43 | 434                  | 0.20  | 0.40 | 1419                | 0.22  | 0.42 | 977                       | 0.24  | 0.43 | 442                  | 0.19  | 0.39 |
| Asthma Attack                   | 1392                | 0.06  | 0.24 | 958                       | 0.07  | 0.25 | 434                  | 0.04  | 0.20 | 1417                | 0.09  | 0.29 | 975                       | 0.10  | 0.30 | 442                  | 0.07  | 0.25 |
| Wheezing/Whistling              | 1397                | 0.15  | 0.35 | 963                       | 0.16  | 0.37 | 434                  | 0.12  | 0.32 | 1414                | 0.20  | 0.40 | 974                       | 0.20  | 0.40 | 440                  | 0.19  | 0.39 |
| <b>MEDIATORS</b>                |                     |       |      |                           |       |      |                      |       |      |                     |       |      |                           |       |      |                      |       |      |
| <u>Mental Health</u>            |                     |       |      |                           |       |      |                      |       |      |                     |       |      |                           |       |      |                      |       |      |
| Psychological Distress          | 1403                | -0.13 | 0.91 | 967                       | -0.09 | 0.92 | 436                  | -0.22 | 0.89 | 1426                | 0.05  | 0.93 | 983                       | 0.01  | 0.93 | 443                  | 0.15  | 0.92 |
| Behavior Problems               | 1403                | 0.03  | 0.90 | 967                       | 0.08  | 0.90 | 436                  | -0.08 | 0.90 | 1426                | -0.08 | 0.88 | 983                       | -0.10 | 0.88 | 443                  | -0.04 | 0.89 |
| <u>Smoking</u>                  |                     |       |      |                           |       |      |                      |       |      |                     |       |      |                           |       |      |                      |       |      |
| Adult Smoker                    | 1360                | 0.29  | 0.45 | 941                       | 0.28  | 0.45 | 419                  | 0.32  | 0.47 | 1365                | 0.31  | 0.46 | 942                       | 0.31  | 0.46 | 423                  | 0.32  | 0.47 |
| Youth Ever Smoked               | 1390                | 0.25  | 0.43 | 958                       | 0.28  | 0.45 | 432                  | 0.19  | 0.39 | 1422                | 0.19  | 0.39 | 980                       | 0.18  | 0.39 | 442                  | 0.21  | 0.41 |
| <u>Housing Disarray</u>         |                     |       |      |                           |       |      |                      |       |      |                     |       |      |                           |       |      |                      |       |      |
| Rooms Cluttered                 | 1299                | 2.44  | 0.71 | 889                       | 2.44  | 0.71 | 410                  | 2.44  | 0.70 | 1326                | 2.42  | 0.71 | 918                       | 2.43  | 0.70 | 408                  | 2.40  | 0.73 |
| Pet Fur                         | 1274                | 0.20  | 0.40 | 877                       | 0.18  | 0.39 | 397                  | 0.22  | 0.41 | 1297                | 0.18  | 0.39 | 898                       | 0.18  | 0.38 | 399                  | 0.20  | 0.40 |
| Interior-of-Home Index          | 1301                | 0.19  | 0.23 | 896                       | 0.18  | 0.23 | 405                  | 0.21  | 0.24 | 1327                | 0.19  | 0.22 | 921                       | 0.19  | 0.22 | 406                  | 0.21  | 0.23 |
| <u>Housing Quality-Observed</u> |                     |       |      |                           |       |      |                      |       |      |                     |       |      |                           |       |      |                      |       |      |
| No Wall-to-wall Carpet          | 1289                | 0.65  | 0.48 | 890                       | 0.63  | 0.48 | 399                  | 0.71  | 0.45 | 1314                | 0.70  | 0.46 | 910                       | 0.68  | 0.47 | 404                  | 0.76  | 0.43 |
| Broken Plaster/Peeling Paint    | 1303                | 0.12  | 0.33 | 896                       | 0.11  | 0.31 | 407                  | 0.16  | 0.37 | 1330                | 0.14  | 0.34 | 921                       | 0.13  | 0.34 | 409                  | 0.16  | 0.36 |
| Cracks/Holes in Windows/Walls   | 1304                | 0.14  | 0.35 | 895                       | 0.14  | 0.35 | 409                  | 0.15  | 0.36 | 1329                | 0.15  | 0.35 | 921                       | 0.15  | 0.35 | 408                  | 0.15  | 0.36 |
| General Condition of Unit       | 1324                | 1.87  | 0.77 | 908                       | 1.82  | 0.73 | 416                  | 1.97  | 0.85 | 1349                | 1.87  | 0.77 | 932                       | 1.82  | 0.74 | 417                  | 1.97  | 0.82 |
| Exterior-of-Home Index          | 1319                | 0.18  | 0.24 | 907                       | 0.17  | 0.23 | 412                  | 0.20  | 0.27 | 1342                | 0.18  | 0.23 | 927                       | 0.17  | 0.22 | 415                  | 0.22  | 0.25 |

Supplemental Table 1. (continued).

|                                     | BOYS                |      |      |                           |       |       |                      |       |       | GIRLS               |      |      |                           |       |       |                      |       |       |
|-------------------------------------|---------------------|------|------|---------------------------|-------|-------|----------------------|-------|-------|---------------------|------|------|---------------------------|-------|-------|----------------------|-------|-------|
|                                     | <u>Total Sample</u> |      |      | <u>Experimental Group</u> |       |       | <u>Control Group</u> |       |       | <u>Total Sample</u> |      |      | <u>Experimental Group</u> |       |       | <u>Control Group</u> |       |       |
|                                     | N                   | Mean | SD   | N                         | Mean  | SD    | N                    | Mean  | SD    | N                   | Mean | SD   | N                         | Mean  | SD    | N                    | Mean  | SD    |
| <u>Housing Quality-Adult Report</u> |                     |      |      |                           |       |       |                      |       |       |                     |      |      |                           |       |       |                      |       |       |
| Broken Locks                        | 1368                | 0.17 | 0.38 | 946                       | 0.16  | 0.37  | 422                  | 0.19  | 0.40  | 1377                | 0.17 | 0.37 | 951                       | 0.17  | 0.37  | 426                  | 0.17  | 0.37  |
| Peeling Paint/Wallpaper             | 1368                | 0.44 | 0.50 | 946                       | 0.43  | 0.49  | 422                  | 0.48  | 0.50  | 1376                | 0.45 | 0.50 | 950                       | 0.42  | 0.49  | 426                  | 0.52  | 0.50  |
| Vermin                              | 1367                | 0.52 | 0.50 | 946                       | 0.50  | 0.50  | 421                  | 0.57  | 0.50  | 1376                | 0.54 | 0.50 | 950                       | 0.53  | 0.50  | 426                  | 0.56  | 0.50  |
| Broken Windows                      | 1368                | 0.24 | 0.43 | 946                       | 0.24  | 0.42  | 422                  | 0.26  | 0.44  | 1377                | 0.23 | 0.42 | 951                       | 0.22  | 0.41  | 426                  | 0.25  | 0.43  |
| Count of Housing Problems           | 1368                | 2.04 | 1.96 | 946                       | 1.94  | 1.95  | 422                  | 2.25  | 1.97  | 1377                | 2.08 | 1.94 | 951                       | 2.01  | 1.95  | 426                  | 2.25  | 1.92  |
| Housing Excellent or Good           | 1368                | 0.57 | 0.50 | 946                       | 0.60  | 0.49  | 422                  | 0.51  | 0.50  | 1376                | 0.54 | 0.50 | 950                       | 0.56  | 0.50  | 426                  | 0.51  | 0.50  |
| <u>Housing Hardship</u>             |                     |      |      |                           |       |       |                      |       |       |                     |      |      |                           |       |       |                      |       |       |
| Heating Problem                     | 1361                | 0.17 | 0.38 | 942                       | 0.17  | 0.38  | 419                  | 0.18  | 0.38  | 1372                | 0.20 | 0.40 | 950                       | 0.18  | 0.39  | 422                  | 0.23  | 0.42  |
| Plumbing Problem                    | 1368                | 0.31 | 0.46 | 946                       | 0.30  | 0.46  | 422                  | 0.35  | 0.48  | 1376                | 0.33 | 0.47 | 950                       | 0.34  | 0.47  | 426                  | 0.33  | 0.47  |
| Utilities Shut Off                  | 1368                | 0.06 | 0.23 | 946                       | 0.06  | 0.24  | 422                  | 0.05  | 0.21  | 1377                | 0.06 | 0.24 | 951                       | 0.07  | 0.25  | 426                  | 0.05  | 0.21  |
| Evicted                             | 1367                | 0.03 | 0.16 | 945                       | 0.03  | 0.17  | 422                  | 0.02  | 0.13  | 1377                | 0.02 | 0.15 | 951                       | 0.02  | 0.15  | 426                  | 0.02  | 0.14  |
| Homeless/Doubled Up                 | 1367                | 0.05 | 0.22 | 945                       | 0.05  | 0.21  | 422                  | 0.07  | 0.25  | 1376                | 0.07 | 0.25 | 950                       | 0.07  | 0.26  | 426                  | 0.05  | 0.22  |
| Problem Paying for Rent or Mortgage | 1359                | 0.25 | 0.58 | 941                       | 0.25  | 0.58  | 418                  | 0.26  | 0.59  | 1367                | 0.26 | 0.56 | 945                       | 0.24  | 0.54  | 422                  | 0.32  | 0.62  |
| Problem Paying for Utilities        | 1361                | 0.84 | 1.34 | 943                       | 0.92  | 1.38  | 418                  | 0.66  | 1.24  | 1369                | 0.75 | 1.31 | 947                       | 0.81  | 1.35  | 422                  | 0.60  | 1.21  |
| <u>Housing Mobility</u>             |                     |      |      |                           |       |       |                      |       |       |                     |      |      |                           |       |       |                      |       |       |
| One Move                            | 1403                | 0.33 | 0.47 | 967                       | 0.335 | 0.472 | 436                  | 0.320 | 0.467 | 1426                | 0.34 | 0.48 | 983                       | 0.338 | 0.473 | 443                  | 0.360 | 0.481 |
| Two + Moves                         | 1403                | 0.43 | 0.49 | 967                       | 0.455 | 0.498 | 436                  | 0.365 | 0.482 | 1426                | 0.45 | 0.50 | 983                       | 0.511 | 0.500 | 443                  | 0.305 | 0.461 |

**Supplemental Table 2. IOW Mediation of the Adolescent MTO Treatment-Parent-Reported Asthma Diagnosis Association; Direct and Indirect Effects.**

| <u>MEDIATOR DOMAINS</u>      | <u>DIRECT EFFECT</u> |           |          | <u>INDIRECT EFFECT</u> |           |          | <u>% CHANGE</u>              |            |            |          |
|------------------------------|----------------------|-----------|----------|------------------------|-----------|----------|------------------------------|------------|------------|----------|
|                              | <u>b</u>             | <u>SE</u> | <u>p</u> | <u>b</u>               | <u>SE</u> | <u>p</u> | <u>% Change</u> <sup>b</sup> | <u>LCI</u> | <u>UCI</u> | <u>N</u> |
| Mental Health <sup>a</sup>   | 0.2221               | 0.149     | 0.135    | 0.0168                 | 0.028     | 0.555    | -7.0%                        | -158.5%    | 144.5%     | 2660     |
| Smoking                      | 0.2432               | 0.142     | 0.087    | 0.0014                 | 0.026     | 0.956    | -0.6%                        | -1656.8%   | 1655.6%    | 2627     |
| Housing Disarray             | 0.2049               | 0.149     | 0.169    | 0.0185                 | 0.027     | 0.497    | -8.3%                        | -3646.1%   | 3629.5%    | 2600     |
| Housing Quality Observed     | 0.1751               | 0.142     | 0.218    | 0.0040                 | 0.033     | 0.902    | -2.2%                        | -402.8%    | 398.4%     | 2648     |
| Housing Quality Adult Report | 0.3184               | 0.141     | 0.024    | -0.0632                | 0.035     | 0.068    | 24.8%                        | -6375.0%   | 6424.5%    | 2832     |
| Housing Hardship             | 0.2165               | 0.140     | 0.121    | 0.0276                 | 0.036     | 0.450    | -11.3%                       | -1606.8%   | 1584.2%    | 2788     |
| Housing Mobility             | 0.2996               | 0.153     | 0.050    | -0.0440                | 0.043     | 0.301    | 17.2%                        | -1166.2%   | 1200.7%    | 2834     |

<sup>a</sup> We tested a model including generalized anxiety disorder as a mediator; results were similar, with a percent change of -9.2%.

<sup>b</sup> % change indicates the % change from the total to the direct effect. Positive values indicate an increase, or a countervailing mediation effect, and negative values indicate a decrease, or mediation in the expected direction, in the direct effect compared to the total effect. The total effect of MTO treatment on asthma diagnosis was  $b(SE)=.256(.134)$ ,  $p=.056$ .

**Supplemental Table 3. IOW Mediation of the Adolescent MTO Treatment-Parent-Reported Asthma Attack Association; Direct and Indirect Effects.**

| <u>MEDIATOR DOMAINS</u>      | <u>DIRECT EFFECT</u> |           |          | <u>INDIRECT EFFECT</u> |           |          | <u>% CHANGE</u>              |            |            |          |
|------------------------------|----------------------|-----------|----------|------------------------|-----------|----------|------------------------------|------------|------------|----------|
|                              | <u>b</u>             | <u>SE</u> | <u>p</u> | <u>b</u>               | <u>SE</u> | <u>p</u> | <u>% Change</u> <sup>b</sup> | <u>LCI</u> | <u>UCI</u> | <u>N</u> |
| Mental Health <sup>a</sup>   | 0.4399               | 0.203     | 0.030    | 0.0122                 | 0.034     | 0.721    | -2.7%                        | -36.1%     | 30.7%      | 2659     |
| Smoking                      | 0.4735               | 0.202     | 0.019    | 0.0030                 | 0.027     | 0.909    | -0.6%                        | -51.2%     | 49.9%      | 2626     |
| Housing Disarray             | 0.4277               | 0.207     | 0.039    | -0.0144                | 0.032     | 0.655    | 3.5%                         | -34.2%     | 41.2%      | 2598     |
| Housing Quality Observed     | 0.4293               | 0.188     | 0.023    | -0.0222                | 0.038     | 0.554    | 5.5%                         | -48.4%     | 59.3%      | 2645     |
| Housing Quality Adult Report | 0.5248               | 0.191     | 0.006    | -0.0762                | 0.043     | 0.074    | 17.0%                        | -94.1%     | 128.0%     | 2829     |
| Housing Hardship             | 0.4457               | 0.203     | 0.028    | -0.0068                | 0.048     | 0.886    | 1.6%                         | -1659.3%   | 1662.5%    | 2785     |
| Housing Mobility             | 0.4867               | 0.200     | 0.015    | -0.0385                | 0.047     | 0.411    | 8.6%                         | -176.6%    | 193.8%     | 2831     |

<sup>a</sup> We tested a model including generalized anxiety disorder as a mediator; results were similar, with a percent change of -2.4%.

<sup>b</sup> % change indicates the % change from the total to the direct effect. Positive values indicate an increase, or a countervailing mediation effect, and negative values indicate a decrease, or mediation in the expected direction, in the direct effect compared to the total effect. The total effect of MTO treatment on asthma attack was  $b(SE)=.448(.186)$ ,  $p=.016$ .

**Supplemental Table 4. IOW Mediation of the Adolescent MTO Treatment-Parent-Reported Wheezing/Whistling Association; Direct and Indirect Effects.**

| <u>MEDIATOR DOMAINS</u>      | <u>DIRECT EFFECT</u> |           |          | <u>INDIRECT EFFECT</u> |           |          | <u>% CHANGE</u>              |            |            |          |
|------------------------------|----------------------|-----------|----------|------------------------|-----------|----------|------------------------------|------------|------------|----------|
|                              | <u>b</u>             | <u>SE</u> | <u>p</u> | <u>b</u>               | <u>SE</u> | <u>p</u> | <u>% Change</u> <sup>b</sup> | <u>LCI</u> | <u>UCI</u> | <u>N</u> |
| Mental Health <sup>a</sup>   | 0.2702               | 0.164     | 0.099    | 0.0200                 | 0.029     | 0.490    | -6.9%                        | -162.2%    | 148.5%     | 2653     |
| Smoking                      | 0.2886               | 0.159     | 0.069    | 0.0091                 | 0.021     | 0.663    | -3.1%                        | -121.6%    | 115.5%     | 2620     |
| Housing Disarray             | 0.2322               | 0.161     | 0.150    | -0.0088                | 0.024     | 0.717    | 4.0%                         | -328.3%    | 336.2%     | 2586     |
| Housing Quality Observed     | 0.2479               | 0.170     | 0.144    | -0.0120                | 0.030     | 0.688    | 5.1%                         | -986.0%    | 996.1%     | 2633     |
| Housing Quality Adult Report | 0.3897               | 0.158     | 0.014    | -0.0840                | 0.038     | 0.028    | 27.5%                        | -9837.0%   | 9892.0%    | 2816     |
| Housing Hardship             | 0.3029               | 0.159     | 0.056    | -0.0120                | 0.041     | 0.772    | 4.1%                         | -528.0%    | 536.2%     | 2773     |
| Housing Mobility             | 0.3701               | 0.174     | 0.033    | -0.0646                | 0.043     | 0.128    | 21.2%                        | -590.5%    | 632.9%     | 2818     |

<sup>a</sup> We tested a model including generalized anxiety disorder as a mediator; results were similar, with a percent change of -9.8%.

<sup>b</sup> % change indicates the % change from the total to the direct effect. Positive values indicate an increase, or a countervailing mediation effect, and negative values indicate a decrease, or mediation in the expected direction, in the direct effect compared to the total effect. The total effect of MTO treatment on wheezing/whistling was  $b(SE)=.305(.154)$ ,  $p=.047$ .

**Supplemental Table 5. IOW Mediation of the MTO Treatment-Parent-Reported Asthma Diagnosis Association, Stratified by Adolescent Gender; Direct and Indirect Effects.**

|                                            | <u>DIRECT EFFECT</u> |           |          | <u>INDIRECT EFFECT</u> |           |          | <u>% Change</u> <sup>b</sup> | <u>% CHANGE</u> |            | <u>N</u> |
|--------------------------------------------|----------------------|-----------|----------|------------------------|-----------|----------|------------------------------|-----------------|------------|----------|
|                                            | <u>b</u>             | <u>SE</u> | <u>p</u> | <u>b</u>               | <u>SE</u> | <u>p</u> |                              | <u>LCI</u>      | <u>UCI</u> |          |
| <b><u>Mental Health</u><sup>a</sup></b>    |                      |           |          |                        |           |          |                              |                 |            |          |
| Boys                                       | 0.1039               | 0.212     | 0.623    | 0.0831                 | 0.059     | 0.157    | -44.4%                       | -859.0%         | 770.1%     | 1330     |
| Girls                                      | 0.3634               | 0.195     | 0.062    | -0.0421                | 0.043     | 0.325    | 13.1%                        | -451.1%         | 477.3%     | 1330     |
| <b><u>Smoking</u></b>                      |                      |           |          |                        |           |          |                              |                 |            |          |
| Boys                                       | 0.1545               | 0.207     | 0.456    | 0.0191                 | 0.046     | 0.678    | -11.0%                       | -296.0%         | 274.0%     | 1312     |
| Girls                                      | 0.3799               | 0.203     | 0.062    | -0.0296                | 0.044     | 0.500    | 8.5%                         | -742.7%         | 759.6%     | 1315     |
| <b><u>Housing Disarray</u></b>             |                      |           |          |                        |           |          |                              |                 |            |          |
| Boys                                       | 0.1056               | 0.211     | 0.616    | 0.0313                 | 0.048     | 0.516    | -22.9%                       | -967.4%         | 921.6%     | 1309     |
| Girls                                      | 0.3315               | 0.201     | 0.100    | 0.0040                 | 0.052     | 0.939    | -1.2%                        | -482.2%         | 479.8%     | 1291     |
| <b><u>Housing Quality Observed</u></b>     |                      |           |          |                        |           |          |                              |                 |            |          |
| Boys                                       | 0.0987               | 0.200     | 0.622    | 0.0139                 | 0.058     | 0.810    | -12.4%                       | -1230.2%        | 1205.5%    | 1337     |
| Girls                                      | 0.2621               | 0.205     | 0.201    | -0.0076                | 0.059     | 0.898    | 3.0%                         | -459.0%         | 465.0%     | 1311     |
| <b><u>Housing Quality Adult Report</u></b> |                      |           |          |                        |           |          |                              |                 |            |          |
| Boys                                       | 0.2541               | 0.191     | 0.184    | -0.0486                | 0.057     | 0.391    | 23.7%                        | -4821.5%        | 4868.8%    | 1436     |
| Girls                                      | 0.4155               | 0.197     | 0.035    | -0.0937                | 0.057     | 0.100    | 29.1%                        | -248.0%         | 306.2%     | 1396     |
| <b><u>Housing Hardship</u></b>             |                      |           |          |                        |           |          |                              |                 |            |          |
| Boys                                       | 0.1378               | 0.207     | 0.506    | 0.0540                 | 0.065     | 0.407    | -28.2%                       | -1332.7%        | 1276.4%    | 1412     |
| Girls                                      | 0.3013               | 0.196     | 0.124    | 0.0048                 | 0.061     | 0.937    | -1.6%                        | -228.8%         | 225.6%     | 1376     |
| <b><u>Housing Mobility</u></b>             |                      |           |          |                        |           |          |                              |                 |            |          |
| Boys                                       | 0.2359               | 0.217     | 0.276    | -0.0276                | 0.069     | 0.688    | 13.3%                        | -3517.2%        | 3543.8%    | 1437     |
| Girls                                      | 0.4061               | 0.212     | 0.056    | -0.0863                | 0.086     | 0.317    | 27.0%                        | -3758.8%        | 3812.7%    | 1397     |

<sup>a</sup> We tested a model including generalized anxiety disorder as a mediator; results were similar, with a percent change of -70.0% for boys and 11.5% for girls.

<sup>b</sup> % change indicates the % change from the total to the direct effect. Positive values indicate an increase, or a countervailing mediation effect, and negative values indicate a decrease, or mediation in the expected direction, in the direct effect compared to the total effect. The total effect of MTO treatment on asthma diagnosis for boys was  $b(SE)=.208(.186)$ ,  $p=.264$ , and for girls was  $b(SE)=.320(.190)$ ,  $p=.094$ .

**Supplemental Table 6. IOW Mediation of the MTO Treatment-Parent-Reported Asthma Attack Association, Stratified by Adolescent Gender; Direct and Indirect Effects.**

|                                            | <u>DIRECT EFFECT</u> |           |          | <u>INDIRECT EFFECT</u> |           |          | <u>% CHANGE</u>              |            |            |          |
|--------------------------------------------|----------------------|-----------|----------|------------------------|-----------|----------|------------------------------|------------|------------|----------|
|                                            | <u>b</u>             | <u>SE</u> | <u>p</u> | <u>b</u>               | <u>SE</u> | <u>p</u> | <u>% Change</u> <sup>b</sup> | <u>LCI</u> | <u>UCI</u> | <u>N</u> |
| <b><u>Mental Health</u><sup>a</sup></b>    |                      |           |          |                        |           |          |                              |            |            |          |
| Boys                                       | 0.5095               | 0.303     | 0.093    | 0.0790                 | 0.063     | 0.213    | -13.4%                       | -117.8%    | 91.0%      | 1330     |
| Girls                                      | 0.3579               | 0.285     | 0.209    | -0.0459                | 0.050     | 0.358    | 14.7%                        | -226.0%    | 255.4%     | 1329     |
| <b><u>Smoking</u></b>                      |                      |           |          |                        |           |          |                              |            |            |          |
| Boys                                       | 0.5680               | 0.299     | 0.057    | 0.0022                 | 0.057     | 0.969    | -0.4%                        | -141.9%    | 141.1%     | 1312     |
| Girls                                      | 0.4188               | 0.286     | 0.143    | -0.0396                | 0.044     | 0.364    | 10.4%                        | -610.5%    | 631.4%     | 1314     |
| <b><u>Housing Disarray</u></b>             |                      |           |          |                        |           |          |                              |            |            |          |
| Boys                                       | 0.5539               | 0.301     | 0.066    | 0.0046                 | 0.058     | 0.937    | -0.8%                        | -100.1%    | 98.5%      | 1309     |
| Girls                                      | 0.2554               | 0.276     | 0.354    | 0.0001                 | 0.054     | 0.998    | -0.1%                        | -1299.8%   | 1299.7%    | 1289     |
| <b><u>Housing Quality Observed</u></b>     |                      |           |          |                        |           |          |                              |            |            |          |
| Boys                                       | 0.5277               | 0.289     | 0.068    | -0.0091                | 0.077     | 0.906    | 1.8%                         | -284.0%    | 287.5%     | 1336     |
| Girls                                      | 0.3403               | 0.262     | 0.194    | -0.0499                | 0.054     | 0.359    | 17.2%                        | -624.9%    | 659.2%     | 1309     |
| <b><u>Housing Quality Adult Report</u></b> |                      |           |          |                        |           |          |                              |            |            |          |
| Boys                                       | 0.6025               | 0.295     | 0.041    | -0.0521                | 0.070     | 0.455    | 9.5%                         | -110.7%    | 129.6%     | 1435     |
| Girls                                      | 0.4439               | 0.278     | 0.110    | -0.1075                | 0.069     | 0.121    | 32.0%                        | -853.0%    | 916.9%     | 1394     |
| <b><u>Housing Hardship</u></b>             |                      |           |          |                        |           |          |                              |            |            |          |
| Boys                                       | 0.4931               | 0.306     | 0.107    | 0.0379                 | 0.077     | 0.621    | -7.1%                        | -204.7%    | 190.4%     | 1411     |
| Girls                                      | 0.3477               | 0.274     | 0.205    | -0.0185                | 0.072     | 0.798    | 5.6%                         | -348.1%    | 359.3%     | 1374     |
| <b><u>Housing Mobility</u></b>             |                      |           |          |                        |           |          |                              |            |            |          |
| Boys                                       | 0.5426               | 0.303     | 0.073    | 0.0093                 | 0.064     | 0.885    | -1.7%                        | -809.1%    | 805.7%     | 1436     |
| Girls                                      | 0.4473               | 0.288     | 0.121    | -0.1129                | 0.084     | 0.181    | 33.8%                        | -5645.0%   | 5712.5%    | 1395     |

<sup>a</sup> We tested a model including generalized anxiety disorder as a mediator; results were similar, with a percent change of -14.8% for boys and 17.3% for girls.

<sup>b</sup> % change indicates the % change from the total to the direct effect. Positive values indicate an increase, or a countervailing mediation effect, and negative values indicate a decrease, or mediation in the expected direction, in the direct effect compared to the total effect. The total effect of MTO treatment on asthma attack for boys was  $b(SE)=.552(.266)$ ,  $p=.038$ , and for girls was  $b(SE)=.334(.255)$ ,  $p=.190$ .

**Supplemental Table 7. IOW Mediation of the MTO Treatment-Parent-Reported Wheezing/Whistling Association, Stratified by Adolescent Gender; Direct and Indirect Effects.**

|                                            | <u>DIRECT EFFECT</u> |           |          | <u>INDIRECT EFFECT</u> |           |          | <u>% CHANGE</u>              |            |            | <u>N</u> |
|--------------------------------------------|----------------------|-----------|----------|------------------------|-----------|----------|------------------------------|------------|------------|----------|
|                                            | <u>b</u>             | <u>SE</u> | <u>p</u> | <u>b</u>               | <u>SE</u> | <u>p</u> | <u>% Change</u> <sup>b</sup> | <u>LCI</u> | <u>UCI</u> |          |
| <b><u>Mental Health</u><sup>a</sup></b>    |                      |           |          |                        |           |          |                              |            |            |          |
| Boys                                       | 0.4141               | 0.237     | 0.080    | 0.0727                 | 0.051     | 0.156    | -14.9%                       | -1.449     | 1.151      | 1329     |
| Girls                                      | 0.1640               | 0.238     | 0.491    | -0.0279                | 0.044     | 0.524    | 20.5%                        | -4.256     | 4.666      | 1324     |
| <b><u>Smoking</u></b>                      |                      |           |          |                        |           |          |                              |            |            |          |
| Boys                                       | 0.4578               | 0.242     | 0.058    | 0.0055                 | 0.043     | 0.898    | -1.2%                        | -2.081     | 2.058      | 1311     |
| Girls                                      | 0.1718               | 0.230     | 0.456    | -0.0018                | 0.037     | 0.962    | 1.1%                         | -16.243    | 16.264     | 1309     |
| <b><u>Housing Disarray</u></b>             |                      |           |          |                        |           |          |                              |            |            |          |
| Boys                                       | 0.4132               | 0.235     | 0.079    | 0.0109                 | 0.044     | 0.803    | -2.6%                        | -1.539     | 1.487      | 1302     |
| Girls                                      | 0.0641               | 0.229     | 0.779    | 0.0028                 | 0.041     | 0.945    | -4.2%                        | -40.599    | 40.514     | 1284     |
| <b><u>Housing Quality Observed</u></b>     |                      |           |          |                        |           |          |                              |            |            |          |
| Boys                                       | 0.4143               | 0.234     | 0.077    | 0.0050                 | 0.055     | 0.928    | -1.2%                        | -47.372    | 47.348     | 1329     |
| Girls                                      | 0.1206               | 0.230     | 0.600    | -0.0311                | 0.053     | 0.556    | 34.7%                        | -2.924     | 3.619      | 1304     |
| <b><u>Housing Quality Adult Report</u></b> |                      |           |          |                        |           |          |                              |            |            |          |
| Boys                                       | 0.5829               | 0.242     | 0.016    | -0.0630                | 0.058     | 0.278    | 12.1%                        | -4.090     | 4.333      | 1427     |
| Girls                                      | 0.2390               | 0.223     | 0.283    | -0.1045                | 0.064     | 0.103    | 77.7%                        | -14.137    | 15.690     | 1389     |
| <b><u>Housing Hardship</u></b>             |                      |           |          |                        |           |          |                              |            |            |          |
| Boys                                       | 0.5076               | 0.247     | 0.040    | -0.0078                | 0.064     | 0.903    | 1.6%                         | -0.967     | 0.999      | 1404     |
| Girls                                      | 0.1793               | 0.227     | 0.430    | -0.0544                | 0.074     | 0.462    | 43.5%                        | -51.196    | 52.067     | 1369     |
| <b><u>Housing Mobility</u></b>             |                      |           |          |                        |           |          |                              |            |            |          |
| Boys                                       | 0.5898               | 0.251     | 0.019    | -0.0685                | 0.057     | 0.229    | 13.1%                        | -0.928     | 1.191      | 1428     |
| Girls                                      | 0.2095               | 0.227     | 0.357    | -0.0774                | 0.074     | 0.296    | 58.6%                        | -10.044    | 11.216     | 1390     |

<sup>a</sup> We tested a model including generalized anxiety disorder as a mediator; results were similar, with a percent change of -17.3% for boys and 11.4% for girls.

<sup>b</sup> % change indicates the % change from the total to the direct effect. Positive values indicate an increase, or a countervailing mediation effect, and negative values indicate a decrease, or mediation in the expected direction, in the direct effect compared to the total effect. The total effect of MTO treatment on wheezing/whistling for boys was  $b(SE)=.521(.228)$ ,  $p=.022$ , and for girls was  $b(SE)=.132(.209)$ ,  $p=.528$ .



**Supplemental Table 8. Moving to Opportunity Youth, Baseline Variables (Measured 1994-97), Overall and by Treatment Group.**

| Construct                            | Variable                                                                              | Overall | Treatment Group |          | p <sup>a</sup> |
|--------------------------------------|---------------------------------------------------------------------------------------|---------|-----------------|----------|----------------|
|                                      |                                                                                       |         | Treatment Group | Controls |                |
| Total Youth in 2002                  | N                                                                                     | 2829    | 1950            | 879      |                |
| Baseline mean poverty rate           | Percent poverty rate in the 1990 census tract                                         | 49.8%   | 49.5%           | 50.5%    |                |
| <b><u>Family Characteristics</u></b> |                                                                                       |         |                 |          |                |
| Victimization                        | Household member victimized by crime during past 6 months                             | 43.0%   | 43.8%           | 41.3%    |                |
| Disability                           | Household member had a disability                                                     | 17.2%   | 17.8%           | 15.8%    |                |
| Site                                 | Baltimore                                                                             | 15.5%   | 16.0%           | 14.2%    |                |
|                                      | Boston                                                                                | 18.9%   | 18.1%           | 20.7%    |                |
|                                      | Chicago                                                                               | 22.4%   | 23.3%           | 20.4%    |                |
|                                      | Los Angeles                                                                           | 18.6%   | 17.5%           | 21.2%    |                |
|                                      | New York                                                                              | 24.6%   | 25.1%           | 23.5%    |                |
| Household size                       | 2 people                                                                              | 7.3%    | 6.9%            | 8.3%     |                |
|                                      | 3 people                                                                              | 22.3%   | 22.1%           | 22.9%    |                |
|                                      | 4 people                                                                              | 25.4%   | 26.2%           | 23.4%    |                |
|                                      | 5 or more people                                                                      | 45.0%   | 44.8%           | 45.4%    |                |
| Presence of Older Children           | No teenagers (age 13-17) in core household                                            | 50.1%   | 49.5%           | 51.3%    |                |
| <b><u>Youth Characteristics</u></b>  |                                                                                       |         |                 |          |                |
| Age (in years)                       |                                                                                       | 9.94    | 9.96            | 9.88     |                |
| Gender                               | Male                                                                                  | 49.9%   | 49.5%           | 51.0%    |                |
|                                      | Female                                                                                | 50.1%   | 50.5%           | 49.0%    |                |
| Race/ethnicity                       | African American                                                                      | 62.8%   | 63.2%           | 62.1%    |                |
|                                      | Hispanic ethnicity, any race                                                          | 30.0%   | 30.3%           | 29.5%    |                |
|                                      | White                                                                                 | 1.1%    | 1.0%            | 1.2%     |                |
|                                      | Other race                                                                            | 2.2%    | 2.4%            | 1.9%     |                |
|                                      | Missing race                                                                          | 3.8%    | 3.2%            | 5.3%     |                |
| Gifted                               | Special class for gifted students or did advanced work                                | 15.4%   | 14.7%           | 16.8%    |                |
| Developmental Problems               | Special school, class, or help for learning problem in past 2 years                   | 16.6%   | 16.7%           | 16.3%    |                |
|                                      | Special school, class, or help for behavioral or emotional problems in past 2 years   | 7.7%    | 8.7%            | 5.3%     | *              |
|                                      | Problems that made it difficult to get to school and/or to play active games          | 6.5%    | 7.1%            | 5.0%     |                |
|                                      | Problems that required special medicine and/or equipment                              | 9.1%    | 10.0%           | 7.0%     | *              |
|                                      | School called about problems child having with schoolwork or behavior in past 2 years | 26.3%   | 26.7%           | 25.4%    |                |

**Supplemental Table 8. (continued).**

| Construct                                    | Variable                                                                             | Overall | Treatment Group |          | P <sup>a</sup> |
|----------------------------------------------|--------------------------------------------------------------------------------------|---------|-----------------|----------|----------------|
|                                              |                                                                                      |         | Treatment Group | Controls |                |
| <b><u>Household Head Characteristics</u></b> |                                                                                      |         |                 |          |                |
| Family Structure                             | Never married                                                                        | 55.9%   | 55.2%           | 57.5%    |                |
|                                              | Teen parent                                                                          | 25.9%   | 26.4%           | 25.0%    |                |
| Socioeconomic Status                         | Employed                                                                             | 25.8%   | 26.1%           | 25.3%    |                |
|                                              | On AFDC (welfare)                                                                    | 76.0%   | 75.5%           | 76.9%    |                |
| Transportation                               | Had a car                                                                            | 19.0%   | 18.7%           | 19.6%    |                |
| Education                                    | Less than high school                                                                | 47.1%   | 47.2%           | 46.7%    |                |
|                                              | High school diploma                                                                  | 36.2%   | 36.6%           | 35.3%    |                |
|                                              | GED                                                                                  | 16.7%   | 16.1%           | 17.9%    |                |
|                                              | In School                                                                            | 13.9%   | 14.4%           | 12.6%    |                |
| Neighborhood/Mobility Variables              | Lived in neighborhood 5 or more years                                                | 65.7%   | 65.8%           | 65.5%    |                |
|                                              | Moved more than 3 times in 5 years                                                   | 8.0%    | 7.5%            | 9.1%     |                |
|                                              | No family living in neigh                                                            | 64.1%   | 63.1%           | 66.3%    |                |
|                                              | No friends living in neigh                                                           | 37.3%   | 36.8%           | 38.5%    |                |
|                                              | Had applied for section 8 voucher before                                             | 44.3%   | 43.6%           | 45.8%    |                |
|                                              | Very dissatisfied with neighborhood                                                  | 44.5%   | 45.4%           | 42.3%    |                |
| Neighbor Relationships                       | Chats with neighbors at least once a week                                            | 51.9%   | 51.3%           | 53.2%    |                |
|                                              | Respondent very likely to tell neighbor if saw neighbor's child getting into trouble | 56.7%   | 56.8%           | 56.4%    |                |

\* p<.05

<sup>a</sup> P-value from test of treatment group differences calculated from Wald chi-square tests output from logistic regression for dichotomous baseline characteristics and multinomial logistic regression for categorical characteristics. F-tests were used with linear regression for continuous variables. The null hypothesis is that the treatment and control group proportions or means did not differ.

NOTES: All variables range between 0 & 1 except baseline age (5-16) and mean poverty rate, so means represent proportions. Analysis weighted for varying treatment random assignment ratios across time, and for attrition. All tests were adjusted for clustering at the family level. Missing baseline characteristic data were imputed to site specific means (<5% missing)<sup>8</sup> or modeled with missing indicators (7% missing for youth giftedness and household head education).

**Supplemental Table 9. First-Leg Mediation Results, Logistic Regression of MTO Treatment on Each Mediator Individually for Adolescents.**

|                                     | Total Sample                     |          |           |          |          | Boys             |          |           |          |          | Girls            |          |           |          |          |
|-------------------------------------|----------------------------------|----------|-----------|----------|----------|------------------|----------|-----------|----------|----------|------------------|----------|-----------|----------|----------|
|                                     | +/- <sup>a</sup>                 | <b>b</b> | <b>SE</b> | <b>p</b> | <b>N</b> | +/- <sup>a</sup> | <b>b</b> | <b>SE</b> | <b>p</b> | <b>N</b> | +/- <sup>a</sup> | <b>b</b> | <b>SE</b> | <b>p</b> | <b>N</b> |
| <u>Mental Health</u>                |                                  |          |           |          |          |                  |          |           |          |          |                  |          |           |          |          |
| Psychological Distress              |                                  | 0.007    | 0.046     | 0.871    | 2829     | -                | 0.136    | 0.065     | 0.035    | 1403     | +                | -0.114   | 0.060     | 0.058    | 1426     |
| Behavior Problems                   | -                                | 0.076    | 0.045     | 0.089    | 2829     | -                | 0.189    | 0.061     | 0.002    | 1403     |                  | -0.043   | 0.059     | 0.464    | 1426     |
| <u>Smoking</u>                      |                                  |          |           |          |          |                  |          |           |          |          |                  |          |           |          |          |
| Adult Smoker                        |                                  | -0.192   | 0.138     | 0.163    | 2725     |                  | -0.298   | 0.193     | 0.122    | 1360     |                  | -0.117   | 0.172     | 0.498    | 1365     |
| Youth Ever Smoked                   |                                  | 0.148    | 0.137     | 0.280    | 2812     | -                | 0.483    | 0.202     | 0.016    | 1390     |                  | -0.215   | 0.173     | 0.214    | 1422     |
| <u>Housing Disarray</u>             |                                  |          |           |          |          |                  |          |           |          |          |                  |          |           |          |          |
| Rooms Cluttered                     |                                  |          |           |          | 2625     |                  |          |           |          | 1299     |                  |          |           |          | 1326     |
|                                     | Very vs. Not at all              | -0.091   | 0.199     | 0.647    |          |                  | -0.012   | 0.282     | 0.966    |          |                  | -0.197   | 0.237     | 0.405    |          |
|                                     | Somewhat vs. Not at all          | 0.028    | 0.134     | 0.835    |          |                  | -0.026   | 0.176     | 0.884    |          |                  | 0.066    | 0.171     | 0.698    |          |
| Pet Fur                             |                                  | -0.237   | 0.163     | 0.147    | 2571     |                  | -0.323   | 0.220     | 0.142    | 1274     |                  | -0.110   | 0.209     | 0.600    | 1297     |
| Interior-of-Home Index              | +                                | -0.029   | 0.014     | 0.033    | 2628     |                  | -0.028   | 0.018     | 0.115    | 1301     |                  | -0.026   | 0.016     | 0.113    | 1327     |
| <u>Housing Quality-Observed</u>     |                                  |          |           |          |          |                  |          |           |          |          |                  |          |           |          |          |
| No Wall-to-wall Carpet              | -                                | -0.524   | 0.140     | 0.000    | 2603     | -                | -0.481   | 0.184     | 0.009    | 1289     | -                | -0.567   | 0.185     | 0.002    | 1314     |
| Broken Plaster/Peeling Paint        | +                                | -0.364   | 0.188     | 0.053    | 2633     | +                | -0.451   | 0.248     | 0.070    | 1303     |                  | -0.278   | 0.228     | 0.223    | 1330     |
| Cracks/Holes in Windows/Walls       |                                  | -0.081   | 0.178     | 0.650    | 2633     |                  | -0.034   | 0.237     | 0.885    | 1304     |                  | -0.133   | 0.216     | 0.537    | 1329     |
| General Condition of Unit           |                                  |          |           |          | 2673     |                  |          |           |          | 1324     |                  |          |           |          | 1349     |
|                                     | Fair vs. Well-kept               | +        | -0.298    | 0.136    | 0.028    |                  |          | -0.177    | 0.179    | 0.322    |                  | +        | -0.418    | 0.179    | 0.019    |
|                                     | Poor vs. Well-kept               |          | 0.023     | 0.222    | 0.916    |                  |          | -0.161    | 0.287    | 0.574    |                  |          | 0.232     | 0.277    | 0.403    |
|                                     | Badly Deteriorated vs. Well-kept | +        | -1.778    | 0.347    | 0.000    |                  | +        | -1.856    | 0.417    | 0.000    |                  | +        | -1.774    | 0.423    | 0.000    |
| Exterior-of-Home Index              | +                                | -0.049   | 0.016     | 0.002    | 2661     | +                | -0.047   | 0.021     | 0.022    | 1319     | +                | -0.048   | 0.018     | 0.009    | 1342     |
| <u>Housing Quality-Adult Report</u> |                                  |          |           |          |          |                  |          |           |          |          |                  |          |           |          |          |
| Broken Locks                        |                                  | -0.156   | 0.165     | 0.342    | 2745     |                  | -0.313   | 0.214     | 0.143    | 1368     |                  | 0.030    | 0.230     | 0.895    | 1377     |
| Peeling Paint/Wallpaper             | +                                | -0.351   | 0.122     | 0.004    | 2744     |                  | -0.233   | 0.161     | 0.148    | 1368     | +                | -0.460   | 0.155     | 0.003    | 1376     |
| Vermin                              | +                                | -0.262   | 0.121     | 0.030    | 2743     | +                | -0.359   | 0.163     | 0.028    | 1367     |                  | -0.133   | 0.156     | 0.395    | 1376     |
| Broken Windows                      | +                                | -0.256   | 0.144     | 0.076    | 2745     |                  | -0.247   | 0.192     | 0.199    | 1368     |                  | -0.267   | 0.181     | 0.141    | 1377     |
| Count of Housing Problems           | +                                | -0.310   | 0.111     | 0.005    | 2745     | +                | -0.351   | 0.147     | 0.017    | 1368     | +                | -0.238   | 0.135     | 0.078    | 1377     |
| Housing Excellent or Good           | +                                | 0.321    | 0.122     | 0.008    | 2744     | +                | 0.436    | 0.163     | 0.007    | 1368     |                  | 0.194    | 0.154     | 0.208    | 1376     |

**Supplemental Table 9. (continued).**

|                                     | Total Sample |       |       |       |      | Boys   |        |       |       | Girls |        |       |       |       |      |
|-------------------------------------|--------------|-------|-------|-------|------|--------|--------|-------|-------|-------|--------|-------|-------|-------|------|
| <u>Housing Hardship</u>             |              |       |       |       |      |        |        |       |       |       |        |       |       |       |      |
| Heating Problem                     | -0.166       | 0.146 | 0.256 | 2733  |      | -0.103 | 0.199  | 0.606 | 1361  |       | -0.247 | 0.183 | 0.178 | 1372  |      |
| Plumbing Problem                    | -0.131       | 0.126 | 0.298 | 2744  | +    | -0.301 | 0.164  | 0.066 | 1368  |       | 0.058  | 0.158 | 0.716 | 1376  |      |
| Utilities Shut Off                  | -            | 0.442 | 0.255 | 0.083 | 2745 |        | 0.379  | 0.342 | 0.268 | 1262  |        | 0.425 | 0.308 | 0.167 | 1377 |
| Evicted                             |              | 0.262 | 0.418 | 0.531 | 2744 |        | 0.574  | 0.704 | 0.415 | 1367  |        | 0.091 | 0.536 | 0.865 | 1256 |
| Homeless/Doubled Up                 |              | 0.102 | 0.247 | 0.680 | 2562 |        | -0.237 | 0.343 | 0.490 | 1261  |        | 0.334 | 0.317 | 0.291 | 1301 |
| Problem Paying for Rent or Mortgage |              |       |       |       | 2726 |        |        |       |       | 1359  |        |       |       |       | 1367 |
| Some vs. No Problems                | -0.253       | 0.184 | 0.169 |       |      | -0.140 | 0.273  | 0.609 |       | +     | -0.352 | 0.207 | 0.090 |       |      |
| A Lot vs. No Problems               | -0.337       | 0.215 | 0.117 |       |      | -0.140 | 0.279  | 0.617 |       | +     | -0.535 | 0.283 | 0.059 |       |      |
| Problem Paying for Utilities        | -            | 0.252 | 0.069 | 0.000 | 2730 | -      | 0.256  | 0.093 | 0.006 | 1361  | -      | 0.233 | 0.084 | 0.006 | 1369 |
| <u>Housing Mobility</u>             |              |       |       |       |      |        |        |       |       |       |        |       |       |       |      |
| Number of Moves                     |              |       |       |       | 2829 |        |        |       |       | 1403  |        |       |       |       | 1426 |
| One Move                            | -            | 0.735 | 0.160 | 0.000 |      | -      | 0.565  | 0.203 | 0.005 |       | -      | 0.988 | 0.213 | 0.000 |      |
| Two + Moves                         | -            | 1.179 | 0.160 | 0.000 |      | -      | 0.794  | 0.208 | 0.000 |       | -      | 1.616 | 0.210 | 0.000 |      |

<sup>a</sup> Among significant ( $p < .10$ ) associations, indicates whether treatment was beneficial (+) or harmful (-).

NOTE: Logit coefficients presented from models predicting treatment from each mediator separately.

**Supplemental Table 10. IOW Mediation of the MTO Treatment-Asthma Diagnosis Association, Stratified by Adolescent Gender; Direct and Indirect Effects.**

|                                            | <u>DIRECT EFFECT</u> |           |          | <u>INDIRECT EFFECT</u> |           |          | <u>% CHANGE</u>              |            |            | <u>N</u> |
|--------------------------------------------|----------------------|-----------|----------|------------------------|-----------|----------|------------------------------|------------|------------|----------|
|                                            | <u>b</u>             | <u>SE</u> | <u>p</u> | <u>b</u>               | <u>SE</u> | <u>p</u> | <u>% Change</u> <sup>b</sup> | <u>LCI</u> | <u>UCI</u> |          |
| <b><u>Mental Health</u><sup>a</sup></b>    |                      |           |          |                        |           |          |                              |            |            |          |
| Boys                                       | 0.1409               | 0.208     | 0.499    | 0.0522                 | 0.058     | 0.368    | -27.0%                       | -754.6%    | 700.6%     | 1393     |
| Girls                                      | 0.3332               | 0.170     | 0.051    | -0.0635                | 0.043     | 0.138    | 23.6%                        | -1626.5%   | 1673.7%    | 1419     |
| <b><u>Smoking</u></b>                      |                      |           |          |                        |           |          |                              |            |            |          |
| Boys                                       | 0.1641               | 0.212     | 0.439    | 0.0184                 | 0.050     | 0.712    | -10.1%                       | -575.9%    | 555.8%     | 1338     |
| Girls                                      | 0.2918               | 0.175     | 0.095    | -0.0755                | 0.039     | 0.053    | 34.9%                        | -900.8%    | 970.7%     | 1355     |
| <b><u>Housing Disarray</u></b>             |                      |           |          |                        |           |          |                              |            |            |          |
| Boys                                       | 0.2219               | 0.222     | 0.318    | -0.0191                | 0.053     | 0.718    | 9.4%                         | -553.2%    | 572.0%     | 1252     |
| Girls                                      | 0.3394               | 0.197     | 0.085    | -0.0465                | 0.043     | 0.278    | 15.9%                        | -326.0%    | 357.8%     | 1282     |
| <b><u>Housing Quality Observed</u></b>     |                      |           |          |                        |           |          |                              |            |            |          |
| Boys                                       | 0.2263               | 0.222     | 0.308    | -0.0252                | 0.059     | 0.671    | 12.5%                        | -1243.6%   | 1268.6%    | 1275     |
| Girls                                      | 0.2234               | 0.184     | 0.224    | 0.0005                 | 0.057     | 0.992    | -0.2%                        | -1607.1%   | 1606.6%    | 1300     |
| <b><u>Housing Quality Adult Report</u></b> |                      |           |          |                        |           |          |                              |            |            |          |
| Boys                                       | 0.2315               | 0.216     | 0.283    | -0.0355                | 0.057     | 0.531    | 18.1%                        | -782.9%    | 819.2%     | 1357     |
| Girls                                      | 0.3218               | 0.178     | 0.071    | -0.0952                | 0.051     | 0.063    | 42.0%                        | -1399.0%   | 1483.0%    | 1370     |
| <b><u>Housing Hardship</u></b>             |                      |           |          |                        |           |          |                              |            |            |          |
| Boys                                       | 0.2087               | 0.219     | 0.340    | -0.0048                | 0.063     | 0.940    | 2.3%                         | -554.7%    | 559.4%     | 1334     |
| Girls                                      | 0.2289               | 0.180     | 0.204    | 0.0003                 | 0.054     | 0.995    | -0.1%                        | -276.7%    | 276.4%     | 1350     |
| <b><u>Housing Mobility</u></b>             |                      |           |          |                        |           |          |                              |            |            |          |
| Boys                                       | 0.2024               | 0.209     | 0.334    | -0.0093                | 0.059     | 0.874    | 4.8%                         | -426.4%    | 436.1%     | 1393     |
| Girls                                      | 0.3797               | 0.188     | 0.043    | -0.1100                | 0.072     | 0.126    | 40.8%                        | -3341.6%   | 3423.2%    | 1419     |

<sup>a</sup> We tested a model including generalized anxiety disorder as a mediator; results were similar, with a percent change of -53.5% for boys and 18.8% for girls.

<sup>b</sup> % change indicates the % change from the total to the direct effect. Positive values indicate an increase, or a countervailing mediation effect, and negative values indicate a decrease, or mediation in the expected direction, in the direct effect compared to the total effect. The total effect of MTO treatment on asthma diagnosis for boys was  $b(SE)=.193(.195)$   $p=.321$ , and for girls was  $b(SE)=.270(.172)$   $p=.116$ .

**Supplemental Table 11. IOW Mediation of the MTO Treatment-Asthma Attack Association, Stratified by Adolescent Gender; Direct and Indirect Effects.**

|                                            | <u>DIRECT EFFECT</u> |           |          | <u>INDIRECT EFFECT</u> |           |          | <u>% CHANGE</u>              |            |            | <u>N</u> |
|--------------------------------------------|----------------------|-----------|----------|------------------------|-----------|----------|------------------------------|------------|------------|----------|
|                                            | <u>b</u>             | <u>SE</u> | <u>p</u> | <u>b</u>               | <u>SE</u> | <u>p</u> | <u>% Change</u> <sup>b</sup> | <u>LCI</u> | <u>UCI</u> |          |
| <b><u>Mental Health</u><sup>a</sup></b>    |                      |           |          |                        |           |          |                              |            |            |          |
| Boys                                       | 0.5775               | 0.301     | 0.055    | 0.0175                 | 0.080     | 0.827    | -2.9%                        | -116.2%    | 110.3%     | 1392     |
| Girls                                      | 0.4855               | 0.258     | 0.060    | -0.0601                | 0.054     | 0.266    | 14.1%                        | -203.8%    | 232.0%     | 1417     |
| <b><u>Smoking</u></b>                      |                      |           |          |                        |           |          |                              |            |            |          |
| Boys                                       | 0.7512               | 0.304     | 0.014    | -0.0141                | 0.076     | 0.853    | 1.9%                         | -93.2%     | 97.0%      | 1337     |
| Girls                                      | 0.3732               | 0.278     | 0.180    | -0.0040                | 0.043     | 0.927    | 1.1%                         | -145.2%    | 147.4%     | 1353     |
| <b><u>Housing Disarray</u></b>             |                      |           |          |                        |           |          |                              |            |            |          |
| Boys                                       | 0.7883               | 0.311     | 0.011    | -0.0391                | 0.068     | 0.567    | 5.2%                         | -90.0%     | 100.4%     | 1251     |
| Girls                                      | 0.3380               | 0.276     | 0.221    | -0.0069                | 0.050     | 0.892    | 2.1%                         | -467.8%    | 472.0%     | 1280     |
| <b><u>Housing Quality Observed</u></b>     |                      |           |          |                        |           |          |                              |            |            |          |
| Boys                                       | 0.7532               | 0.319     | 0.018    | -0.0266                | 0.086     | 0.757    | 3.7%                         | -60.3%     | 67.6%      | 1274     |
| Girls                                      | 0.3298               | 0.285     | 0.247    | 0.0076                 | 0.059     | 0.897    | -2.2%                        | -1636.2%   | 1631.7%    | 1298     |
| <b><u>Housing Quality Adult Report</u></b> |                      |           |          |                        |           |          |                              |            |            |          |
| Boys                                       | 0.8385               | 0.305     | 0.006    | -0.0871                | 0.079     | 0.271    | 11.6%                        | -43.5%     | 66.7%      | 1356     |
| Girls                                      | 0.4244               | 0.274     | 0.122    | -0.0347                | 0.064     | 0.588    | 8.9%                         | -380.8%    | 398.6%     | 1368     |
| <b><u>Housing Hardship</u></b>             |                      |           |          |                        |           |          |                              |            |            |          |
| Boys                                       | 0.8218               | 0.302     | 0.007    | -0.0606                | 0.090     | 0.500    | 8.0%                         | -35.7%     | 51.7%      | 1333     |
| Girls                                      | 0.3573               | 0.269     | 0.185    | 0.0297                 | 0.062     | 0.630    | -7.7%                        | -390.6%    | 375.3%     | 1348     |
| <b><u>Housing Mobility</u></b>             |                      |           |          |                        |           |          |                              |            |            |          |
| Boys                                       | 0.6568               | 0.296     | 0.027    | -0.0618                | 0.072     | 0.393    | 10.4%                        | -136.4%    | 157.2%     | 1392     |
| Girls                                      | 0.5057               | 0.270     | 0.061    | -0.0803                | 0.090     | 0.371    | 18.9%                        | -373.1%    | 410.9%     | 1417     |

<sup>a</sup> We tested a model including generalized anxiety disorder as a mediator; results were similar, with a percent change of -3.6% for boys and 10.4% for girls.

<sup>b</sup> % change indicates the % change from the total to the direct effect. Positive values indicate an increase, or a countervailing mediation effect, and negative values indicate a decrease, or mediation in the expected direction, in the direct effect compared to the total effect. The total effect of MTO treatment on asthma attack for boys was  $b(SE)=.595(.294)$ ,  $p=.043$ , and for girls was  $b(SE)=.425(.257)$ ,  $p=.098$ .

**Supplemental Table 12. IOW Mediation of the MTO Treatment-Wheezing/Whistling Association, Stratified by Adolescent Gender; Direct and Indirect Effects.**

|                                            | <u>DIRECT EFFECT</u> |           |          | <u>INDIRECT EFFECT</u> |           |          | <u>% Change<sup>b</sup></u> | <u>% CHANGE</u> |            | <u>N</u> |
|--------------------------------------------|----------------------|-----------|----------|------------------------|-----------|----------|-----------------------------|-----------------|------------|----------|
|                                            | <u>b</u>             | <u>SE</u> | <u>p</u> | <u>b</u>               | <u>SE</u> | <u>p</u> |                             | <u>LCI</u>      | <u>UCI</u> |          |
| <b><u>Mental Health<sup>a</sup></u></b>    |                      |           |          |                        |           |          |                             |                 |            |          |
| Boys                                       | 0.2361               | 0.183     | 0.197    | 0.0694                 | 0.051     | 0.171    | -22.7%                      | -501.5%         | 456.1%     | 1397     |
| Girls                                      | 0.1314               | 0.181     | 0.468    | -0.0696                | 0.043     | 0.109    | 112.6%                      | -2283.7%        | 2509.0%    | 1414     |
| <b><u>Smoking</u></b>                      |                      |           |          |                        |           |          |                             |                 |            |          |
| Boys                                       | 0.3268               | 0.199     | 0.101    | -0.0004                | 0.034     | 0.990    | 0.1%                        | -176.7%         | 177.0%     | 1343     |
| Girls                                      | 0.1166               | 0.185     | 0.529    | -0.0263                | 0.031     | 0.389    | 29.2%                       | -147011.9%      | 147070.3%  | 1350     |
| <b><u>Housing Disarray</u></b>             |                      |           |          |                        |           |          |                             |                 |            |          |
| Boys                                       | 0.2768               | 0.195     | 0.156    | 0.0212                 | 0.044     | 0.629    | -7.1%                       | -734.2%         | 719.9%     | 1256     |
| Girls                                      | 0.1208               | 0.189     | 0.522    | -0.0205                | 0.032     | 0.518    | 20.4%                       | -4699.5%        | 4740.3%    | 1277     |
| <b><u>Housing Quality Observed</u></b>     |                      |           |          |                        |           |          |                             |                 |            |          |
| Boys                                       | 0.2845               | 0.199     | 0.153    | 0.0207                 | 0.056     | 0.710    | -6.8%                       | -445.4%         | 431.9%     | 1279     |
| Girls                                      | 0.0586               | 0.186     | 0.753    | -0.0310                | 0.039     | 0.423    | 112.6%                      | -1722.7%        | 1947.9%    | 1294     |
| <b><u>Housing Quality Adult Report</u></b> |                      |           |          |                        |           |          |                             |                 |            |          |
| Boys                                       | 0.3444               | 0.210     | 0.102    | 0.0002                 | 0.046     | 0.996    | -0.1%                       | -326.3%         | 326.2%     | 1361     |
| Girls                                      | 0.1321               | 0.187     | 0.479    | -0.0539                | 0.044     | 0.222    | 69.0%                       | -3128.7%        | 3266.8%    | 1364     |
| <b><u>Housing Hardship</u></b>             |                      |           |          |                        |           |          |                             |                 |            |          |
| Boys                                       | 0.3860               | 0.214     | 0.071    | -0.0095                | 0.056     | 0.865    | 2.5%                        | -393.5%         | 398.5%     | 1338     |
| Girls                                      | 0.0740               | 0.180     | 0.681    | 0.0125                 | 0.049     | 0.800    | -14.5%                      | -2810.4%        | 2781.4%    | 1345     |
| <b><u>Housing Mobility</u></b>             |                      |           |          |                        |           |          |                             |                 |            |          |
| Boys                                       | 0.3052               | 0.189     | 0.106    | 0.0002                 | 0.047     | 0.996    | -0.1%                       | -643.0%         | 642.8%     | 1397     |
| Girls                                      | 0.1827               | 0.188     | 0.331    | -0.1209                | 0.059     | 0.041    | 195.5%                      | -2812.8%        | 3203.8%    | 1414     |

<sup>a</sup> We tested a model including generalized anxiety disorder as a mediator; results were similar, with a percent change of -19.8% for boys and 146.5% for girls.

<sup>b</sup> % change indicates the % change from the total to the direct effect. Positive values indicate an increase, or a countervailing mediation effect, and negative values indicate a decrease, or mediation in the expected direction, in the direct effect compared to the total effect. The total effect of MTO treatment on wheezing/whistling for boys was  $b(SE)=.305(.190)$   $p=.108$ , and for girls was  $b(SE)=.062(.172)$   $p=.719$ .
